# Supplementary material for: Correction: Author's Reply
Source: PLoS Med. 2006 May 30;3(5):e225. doi: 10.1371/journal.pmed.0030225 (PMC1468467; doi:10.1371/journal.pmed.0030225)
Supplement: Dataset S1 — (41.5 KB XLS). [file pmed.0030225.sd001.xls]

## Sheet: Print
Ind. Num.					Last Update in UNSD DB		Number and Range of Years Covered				Number of Countries Covered				Countries with data for both benchmark years		Notes
		CDB Series	MDG	Data Series Name			From	To	Min	Max	Total	1 point	2 points	3+ points	Num.	%
(a)				(b)	(c)		(d)	(e)	(f)	(g)	(h)	(i)	(j)	(k)	(l)	(m)	(n)
1	580	29946	Y	Poverty, percentage of population below $1 (PPP) per day consumption (WB)	2004-09-22 16:23:00	1979	1990	2002	1	7	94	15	27	52	25	0.265957
2	584	29949	Y	Poverty gap ratio: mean percentage distance below 1 dollar (PPPs) per day (WB estimates)	2004-09-22	1979	1990	2002	1	7	94	16	25	53	25	0.265957
3	585	29950	Y	Poorest quintile's share in national income or consumption, per cent (WB estimates)	2004-10-07 15:56:00	1981	1990	2002	1	1	125	125	0	0	0	0
4	559	1200	Y	Children under 5 moderately or severely underweight, per cent (UNICEF estimates)	2004-11-22 13:26:00	1976	1990	2003	1	2	138	84	54	0	25	0.181159
5	566	3690	Y	Nutrition, undernourished as percentage of total population (FAO estimates)	2004-06-01 11:21:00	1980	1990	2000	1	3	127	1	37	89	97	0.76378
6	589	29954	Y	Education enrolment ratio, net, primary level, by sex (UNESCO)	2004-12-01 17:32:00	1990	1990	2002	1	6	190	27	20	143	145	0.763158
7	591	29955	Y	Education, percentage of pupils starting grade 1 reaching grade 5, by sex (UNESCO)	2004-12-02 14:56:00	1990	1990	2001	1	5	134	38	26	70	54	0.402985
7	743	30210	Y	Education, primary completion rate, by sex (UNESCO)	2004-12-22 12:58:00	1998	1998	2002	1	5	172	24	18	130	0	0
8	656	29999	Y	Literacy rates, aged 15-24, by sex, per cent (UNESCO)	2004-11-22 10:52:00	1980	1990	2004*	1	2	142	27	115	0	0	0
9	611	29976	Y	Girls to boys ratio, primary level enrolment (UNESCO)	2004-12-22 16:40:00	1986	1990	2002	1	6	191	8	16	167	165	0.863874
9	613	29978	Y	Girls to boys ratio, secondary level enrolment (UNESCO)	2004-12-22 16:40:00	1986	1990	2002	1	6	187	13	24	150	133	0.71123
9	614	29979	Y	Girls to boys ratio, tertiary level enrolment (UNESCO)	2004-12-22 16:40:00	1990	1990	2002	1	6	172	28	33	111	88	0.511628
10	643	30000	Y	Women to men parity index, as ratio of literacy rates, aged 15-24 (UNESCO)	2004-11-22 13:26:00	1980	1990	2004*	1	2	151	31	120	0	2	0.013245
11	722	29973	Y	Women wage employment in non-agricultural sector as percentage of total non-agriculture employees (ILO)	2004-07-20 11:28:00	1986	1990	2002	1	13	198	64	10	124	130	0.656566
12	557	1020	Y	Women in parliamentary seats, per cent (IPU)	2004-04-29 11:37:00	1990	1990	2004	1	9	190	9	7	174	117	0.615789
13	561	1220	Y	Children under five mortality rate per 1,000 live births (UNICEF estimates)	2004-04-16 15:01:00	1960	1990	2003	1	6	196	2	0	194	191	0.97449
14	562	1230	Y	Infant mortality rate (0-1 year) per 1,000 live births (UNICEF estimates)	2004-04-16 15:01:00	1960	1990	2003	1	8	198	2	0	196	193	0.974747
15	563	1240	Y	Children 1 year old immunized against measles, per cent (UNICEF estimates)	2004-10-25	1980	1990	2003	2	14	192	0	1	191	182	0.947917
16	553	1000	Y	Maternal mortality ratio per 100,000 live births (WHO, UNICEF and UNFPA)	2004-01-23	1990	1990	2000	1	3	184	2	23	159	159	0.86413
17	570	25730	Y	Births attended by skilled health personnel, per cent (UNICEF estimates)	2004-01-27	1988	1990	2002	1	7	176	170	5	1	2	0.0113636
18	746	30246	Y	HIV/AIDS prevalence rate for pregnant women 15-24 attending antenatal care in clinics in capital city	2004-10-25	2000	2000	2003	1	4	23	8	10	5	0	0
19	730	1050	Y	Contraceptive use among currently married women aged 15-49, by methods, per cent	2004-09-17	1980	1990	2003	1	4	153	86	59	8	23	0.150327
19	733	30029	Y	Condom use to overall contraceptive use among currently married women aged 15-49, per cent	2004-09-15 09:49:00	1980	1990	2003	1	3	143	84	51	8	21	0.146853
19	734	30017	Y	Condom use, 15-24 year-olds, at last high-risk sex, by sex, per cent (UNICEF-UNAIDS-WHO)	2004-11-09 10:08:00	1996	1996	2002	1	2	40	39	1	0	0	0
19	735	30017	Y	Condom use, 15-24 year-olds, at last high-risk sex, by sex, per cent (UNICEF-UNAIDS-WHO)	2004-11-09 10:08:00	1996	1996	2002	1	1	48	48	0	0	0	0
19	741	30209	Y	HIV knowledge, 15-24 year-olds who have comprehensive correct knowledge of HIV/AIDS, by sex, per cent (UNICEF-UNAIDS-WHO)	2004-11-09 14:59:00	1998	1998	2001	1	1	13	13	0	0	0	0
19	742	30209	Y	HIV knowledge, 15-24 year-olds who have comprehensive correct knowledge of HIV/AIDS, by sex, per cent (UNICEF-UNAIDS-WHO)	2004-11-09 14:59:00	1998	1998	2001	1	1	44	44	0	0	0	0
20	726	30011	Y	Orphans (both parents) aged 10-14 school attendance rate as % of non-orphans attendance rate, where HIV is 1%+ (UNICEF-UNAIDS-WHO)	2004-11-08 17:55:00	0	1996	2002	1	2	43	40	3	0	0	0
21	644	29996	Y	Malaria prevalence, notified cases per 100,000 population (WHO)	2002-06-13 15:50:00	1989	1990	2002	1	3	108	105	2	1	1	0.00925926
21	663	30001	Y	Malaria death rate per 100,000, all ages and ages 0-4	2002-06-14	1992	1992	2001	1	3	191	188	0	3	0	0
22	645	29998	Y	Malaria prevention, use of insecticide-treated bed nets in population <5, per cent (UNICEF)	2004-11-10 09:34:00	1999	1999	2003	1	2	39	36	3	0	0	0
22	646	29997	Y	Malaria treatment, percentage of population <5 with fever being treated with anti-malarial drugs (UNICEF)	2004-11-10 09:34:00	1998	1998	2003	1	2	39	35	4	0	0	0
23	617	29982	Y	Tuberculosis prevalence rate per 100,000 population (WHO)	2004-05-17	1992	1992	2002	2	4	211	0	4	207	1	0.00473934
23	647	30002	Y	Tuberculosis death rate per 100,000 (WHO)	2004-05-17	1994	1994	2002	3	4	211	0	0	211	0	0
24	618	29983	Y	Tuberculosis, DOTS treatment success, per cent (WHO)	2004-05-17 15:52:00	1994	1994	2002	1	8	180	15	14	151	0	0
24	718	30026	Y	Tuberculosis, DOTS detection rate, per cent (WHO)	2004-05-17 15:51:00	1995	1995	2002	3	8	211	0	0	211	0	0
25	567	3740	Y	Forested land area as percentage of land area (FAO estimates)	2002-06-12	1989	1990	2000	1	2	202	4	198	0	198	0.980198
26	616	29981	Y	Protected area ratio to surface area (UNSD calculated from UNEP-WCMC)	2002-07-11	1997	1997	1997	1	1	183	183	0	0	0	0
27	648	29995	Y	Energy supply (apparent consumption; Kg oil equivalent) per $1,000 (PPP) GDP (World Bank)	2004-11-10	1975	1990	2001	8	12	120	0	0	120	117	0.975
28	577	28630	Y	Carbon dioxide emissions (CO2), metric tons of CO2 per capita(UNFCCC-UNDESA/Statistics Division)	2004-08-31	1980	1990	2001	1	12	202	1	2	199	194	0.960396
28	649	29985	Y	Ozone-depleting CFCs consumption in ODP tons (UNEP-Ozone Secretariat)	2003-04-24 15:24:00	1986	1990	2001	1	12	155	1	0	154	114	0.735484
29	712	30020	Y	Air pollution, percentage of population using biomass fuels (WHO)	2002-01-01	0	0	0	0	0	0	0	0	0	0	0
30	665	27910	Y	Water, percentage of population with access to improved drinking water sources, total, urban and rural	2004-11-01	1986	1990	2002	1	4	180	48	123	9	9	0.05
31	668	27920	Y	Sanitation, percentage of population with access to improved sanitation, total, urban and rural	2004-11-01	1986	1990	2002	1	4	168	49	111	8	7	0.0416667
32	710	30019	Y	Slum population as percentage of urban (secure tenure index)(UN-HABITAT)	2002-01-01	0	0	0	0	0	0	0	0	0	0	0
33	568	13270	Y	ODA, net, as percentage of OECD/DAC donors’ GNI (OECD)	2004-11-24 15:27:00	1990	1990	2003	8	14	22	0	0	22	21	0.954545
33	650	29993	Y	ODA to LDCs, net, as percentage of OECD/DAC donors’ GNI (OECD)	2004-11-24 15:25:00	1990	1990	2003	8	14	22	0	0	22	21	0.954545
34	593	29957	Y	ODA to basic social services as percentage of sector-allocable ODA (OECD)	2004-03-26 14:32:00	1996	1996	2002	2	4	21	0	1	20	0	0
35	599	29963	Y	ODA bilateral, percentage untied (OECD)	2004-11-24 15:28:00	1990	1990	2003	3	14	21	0	0	21	16	0.761905
36	652	30003	Y	Landlocked developing countries, ODA received, as percentage of their GNI (OECD)	2004-11-24 15:29:00	1990	1990	2003	11	14	30	0	0	30	27	0.9
37	653	30004	Y	Small islands ODA received, as percentage of their GNI (OECD)	2004-11-24 15:30:00	1990	1990	2003	6	14	34	0	0	34	32	0.941176
38	713	30023	Y	Market access, developed country imports from developing countries, admitted duty free, per cent (WTO)	2002-01-01	0	0	0	0	0	0	0	0	0	0	0
38	714	30024	Y	Market access, developed country imports from the LDCs, admitted duty free, per cent (WTO)	2002-01-01	0	0	0	0	0	0	0	0	0	0	0
39	715	30021	Y	Market access, average tariffs imposed by developed countries on textiles from developing countries (WTO)	2002-01-01	0	0	0	0	0	0	0	0	0	0	0
39	716	30022	Y	Market access, average tariffs imposed by developed countries on clothing from developing countries (WTO)	2002-01-01	0	0	0	0	0	0	0	0	0	0	0
40	654	29994	Y	Agriculture support estimate for OECD countries as percentage of their GDP (OECD)	2004-11-29 15:02:00	1986	1990	2003	11	14	16	0	0	16	15	0.9375
41	717	30025	Y	ODA, percentage provided to help build trade capacity (WTO,OECD)	2004-11-24 15:26:00	2001	2001	2003	1	3	21	3	1	17	0	0
42	740	30202	Y	Total number of countries that have reached their HIPC decision points and number that have reached their HIPC completion points (cumulative) (IMF - World Bank)	2004-08-18	2002	2002	2004	3	3	38	0	0	38	0	0
43	688	30009	Y	Debt relief committed under HIPC initiative, cumulative US$ million (IMF)	2004-08-01	2003	2003	2003	1	1	28	28	0	0	0	0
44	655	29909	Y	Debt service as percentage of exports of goods, services and net income from abroad (WB)	2004-11-30 15:52:00	1970	1990	2002	2	13	136	0	4	132	98	0.720588
45	630	29961	Y	Youth unemployment rate, aged 15-24, by sex, (ILO estimates)	2004-08-17	1980	1990	2002	1	13	98	11	9	78	63	0.642857
46	621	29986	Y	Access to essential drugs, percentage of population (WHO estimates)	2002-07-11	1987	0	0	0	0	0	0	0	0	0	0
47	604	29968	Y	Telephone lines and cellular subscribers per 100 population (ITU estimates)	2004-03-23 15:44:00	1980	1990	2002	1	13	216	1	0	215	211	0.976852
48	605	29969	Y	Internet users per 100 population (ITU estimates)	2004-03-23 15:46:00	1980	1990	2002	1	13	216	6	3	207	204	0.944444
48	607	29971	Y	Personal computers per 100 population (ITU estimates)	2004-03-23 15:47:00	1980	1990	2002	1	13	176	7	0	169	74	0.420455
* refers to period 2000-2004

## Sheet: Cover
Millennium Indicators Database
http://millenniumindicators.un.org/unsd/mi/mi_goals.asp
Data Availability Analysis as of 20 January 2005
General
The attached table shows the data availability for the 48 Millennium Development Indicators in the UNSD Database. It shows for each indicator:
• time range covered by the data
• how many points in time data are available for
• last available year
• whether or not the benchmark years are included
Explanation of Columns
Columns (a) to (c) - general information
(a)	Indicator number
(b)	Data series name (please note that each indicator might have more than one data series associated with it, e.g. indicator 9, girls to boys ratio in primary, secondary and tertiary level)
(c)	Date of most recent update in the UNSD database
Columns (d) to (g) - year coverage
(d)	First year covered by data series
(e)	Last year covered by data series
(f)	Minimum number of years covered by data series
(g)	Maximum number of years covered by data series
Columns (h) to (k) - country coverage
(h)	Total number of countries for which data are available
(i)	Number of countries that have only one data point in this series
(j)	Number of countries that have only two data points in this series
(k)	Number of countries that have three or more data points in this series
Columns (l) to (m) - benchmarks coverage
(l)	Number of countries that have data around both 1990 and 2000 (at least one data point between 1990-1992 AND one between 1999-2001)
(m)	Percentage of countries which have data around both benchmarks (= (l) / (h) * 100)
(n)	General comments and notes for a particular data series.
Note: some indicators have no data at the country level and therefore show zero values in the attached table.

## Sheet: FC_Notes
Notes
